# Supplementary material for: The fungal T-2 toxin alters the activation of primary macrophages induced by TLR-agonists resulting in a decrease of the inflammatory response in the pig
Source: PubMed Central journal article supplement (PMC3416672; doi:10.1186/1297-9716-43-35), 2012-04-24
Supplement: 1297-9716-43-35-S1.pdf [file 1297-9716-43-35-S1.pdf]

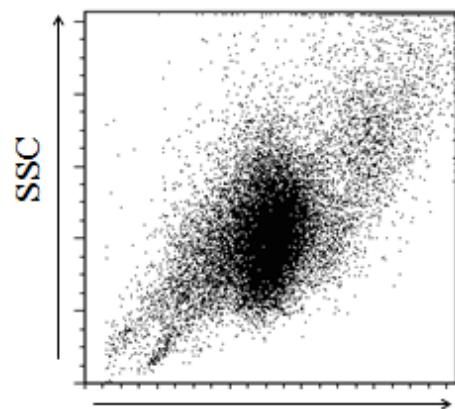

FCS

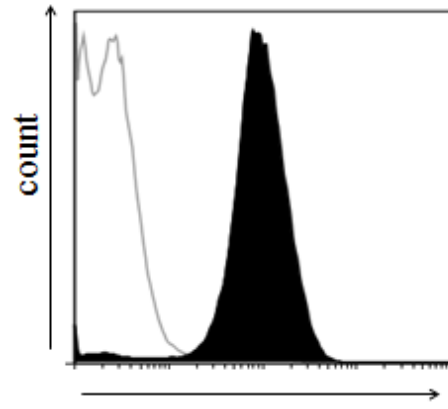

SWC3

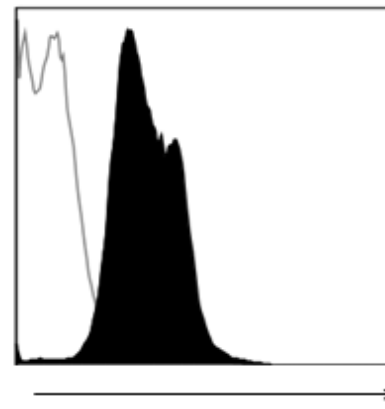

SWC1

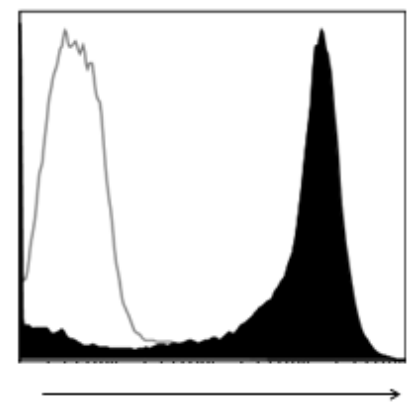

CD163

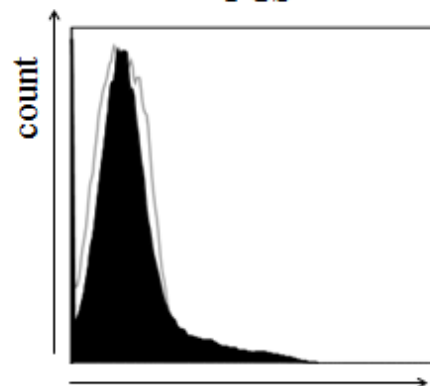

CD14

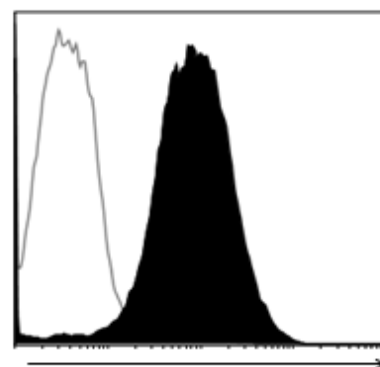

CD16

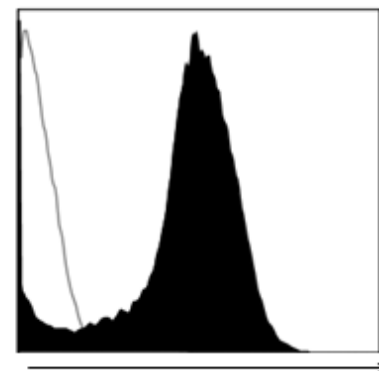

MHCII

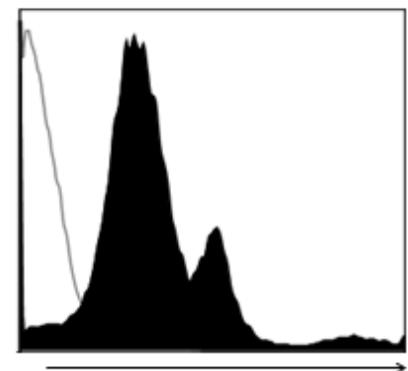

DC-sign
